# Supplementary material
Source: PubMed Central journal article supplement (PMC3416541)
Supplement: JB.00290-12_zjb999091699so1.pdf [file JB.00290-12_zjb999091699so1.pdf]

## SUPPLEMENTAL METHODS

### Additional Bacterial Strains

DM4000 and its derivatives DM4000 *priA2::kan* (JC18983) and DM4000 *priA2::kan dnaC809* (JC19008) have been described previously {Sandler et al., 1996, Genetics 143, 5-13}. In brief, the genotype for DM4000 is  $\Delta(lac-pro)XIII$  *hisG4 argE3 thr-1 ara-14 xyl-5 mtl-1 rpsL3l sulA::Mu-d*(Ap, *lac*, B::Tn9). On testing, this strain appears to require biotin and thiamine for growth.

### DNA Synthesis

For *thy*<sup>+</sup> strains, overnight cultures were diluted 1:100 and grown in DGC medium supplemented with 1  $\mu\text{g/ml}$  each of thiamine and biotin to an  $\text{OD}_{600}$  of precisely 0.3, at which point half of the culture was mock irradiated, while the other half received an incident dose of 27  $\text{J/m}^2$ . At the times indicated, duplicate 0.5-ml aliquots of culture were pulse-labeled with 1  $\mu\text{Ci/ml}$  <sup>3</sup>H-thymidine for 2 min at 37°C. Cells were then lysed and the DNA precipitated in cold 5% TCA. The precipitate was collected on Millipore glass fiber filters and the amount of <sup>3</sup>H on each filter was determined by scintillation counting.

### Growth Rates

Fresh overnight cultures were serially diluted by 10-fold in DGC medium supplemented with 1  $\mu\text{g/ml}$  each of thiamine and biotin, and 0.2-ml aliquots were then plated in duplicate into the wells of a sterile 96-well microtiter dish. The microtiter cultures were then agitated at 37°C and the  $\text{OD}_{600}$  for each culture was measured over time using a BIO-Whittaker EL<sub>x</sub>808 plate-reader. The number of viable colonies per ml in each overnight culture was determined at the start of every experiment.

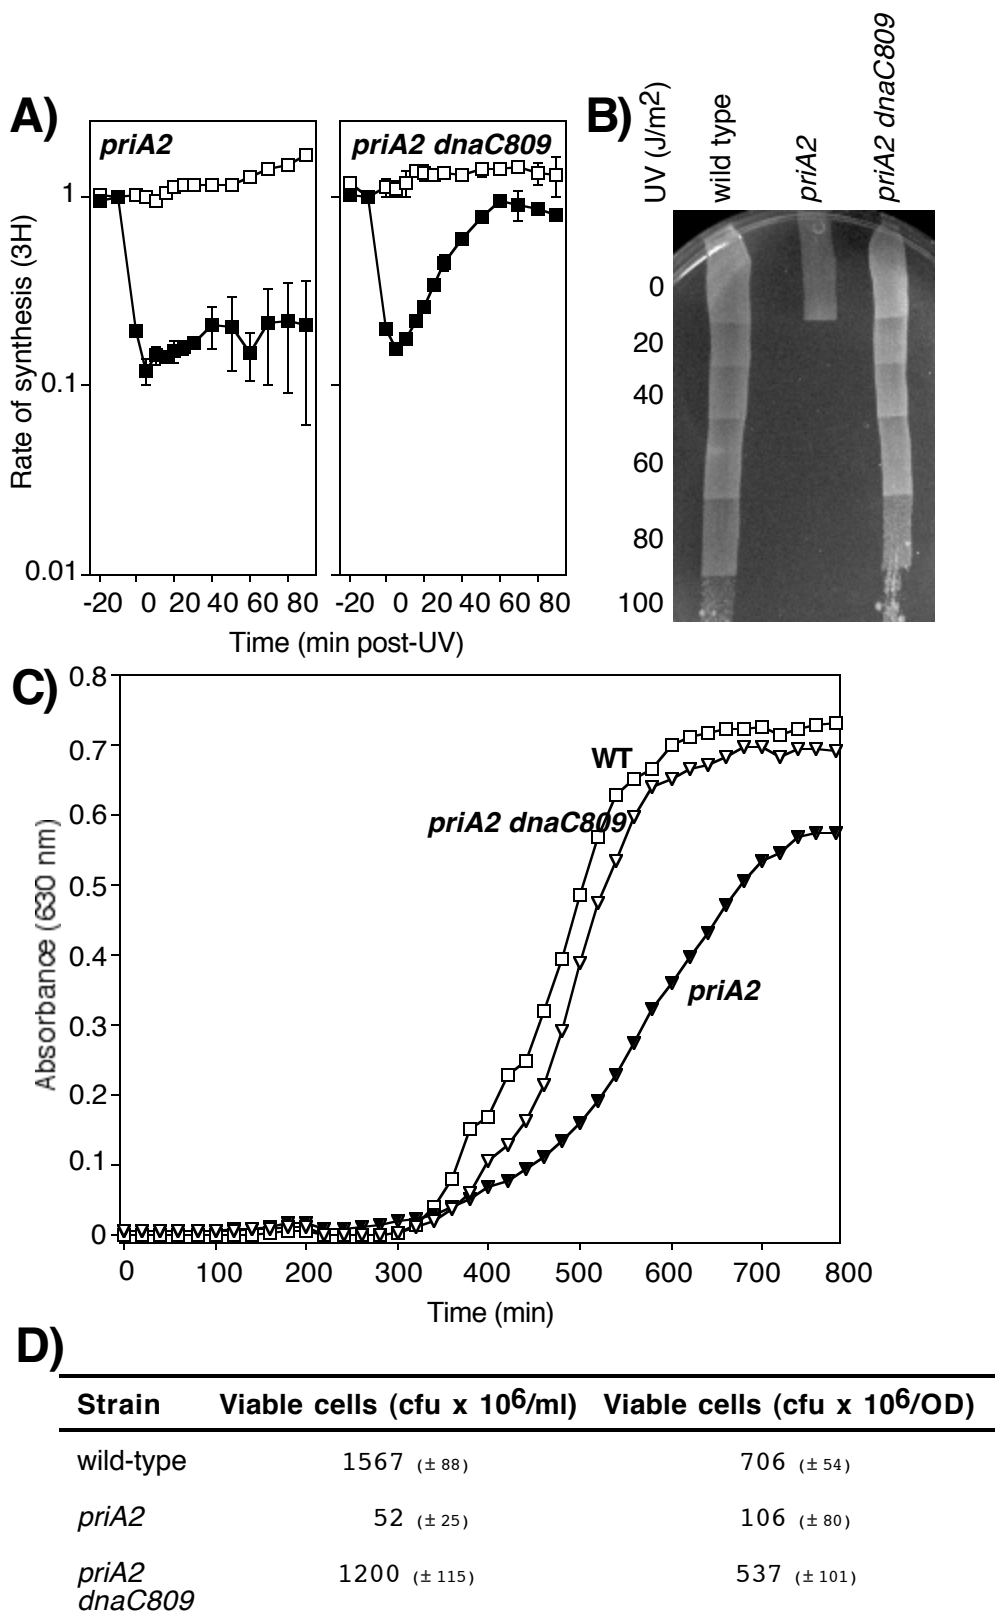

Figure S1 *dnaC809* suppresses the poor replication recovery of *priA2* cells following UV irradiation and restores wild-type growth to these cells. (A)  $^3H$ -thymidine was added to cultures for 2 min at the indicated times following either 27  $J/m^2$  UV irradiation (filled symbols) or mock irradiation (open symbols) at time 0. The amount of DNA synthesis/2min at each time point relative to -10 min post-UV,  $^3H$  ( $\square$ ), is plotted. Graphs represent an average of at least three independent experiments. Error bars represent one standard deviation. (B) Survival of parental (wild type), *priA2* and *priA2 dnaC809* cells following UV irradiation with the indicated dose. (C) The OD<sub>600</sub> of wild-type ( $\square$ ), *priA2* ( $\blacktriangledown$ ), and *priA2 dnaC809* ( $\nabla$ ) strains is plotted over time. (D) The number of viable cells in overnight cultures of wild-type, *priA2*, and *priA2 dnaC809* strains is indicated in cfu  $\times 10^6$ /ml and cfu  $\times 10^6$ /OD.

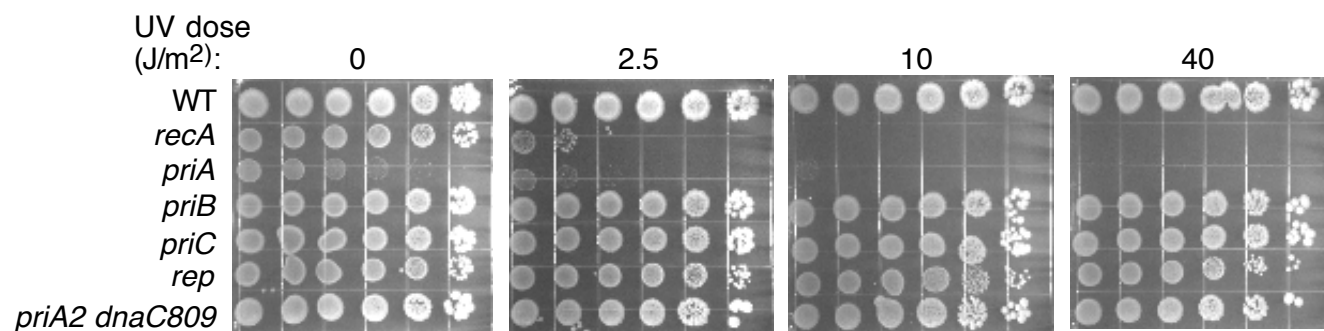

Figure S2 Survival of wild-type, *recA*, *priA2*, *priB302*, *priC*, *rep* and *priA2 dnaC809* strains following UV irradiation. Serial 10-fold dilutions of each strain were applied as 10- $\mu$ l spots onto LBthy plates. Strains were exposed to the indicated dose of UV irradiation and allowed to grow at 37°C for 24 h.
